# Supplementary material for: Modified template synthesis and electrochemical performance of a Co3O4/mesoporous cathode for lithium–oxygen batteries
Source: Royal Society of Chemistry journal article supplement (doi:10.1039/c5ta03091a), 2015-01-01
Supplement: c5ta03091a1.pdf [file c5ta03091a1.pdf]

# Modified template synthesis and electrochemical performance of $\text{Co}_3\text{O}_4$ /mesoporous carbon composite as a cathode material for lithium-oxygen batteries

Shaofeng Wang<sup>a</sup>, Yujing Sha<sup>a</sup>, Yinlong Zhu<sup>a</sup>, Xiaomin Xu<sup>a</sup>, Zongping Shao<sup>a, b\*</sup>

*a.* State Key Laboratory of Materials-Oriented Chemical Engineering, Nanjing Tech University, Nanjing 210009, China.

*b.* College of Energy, Nanjing Tech. University, Nanjing 210009, China.

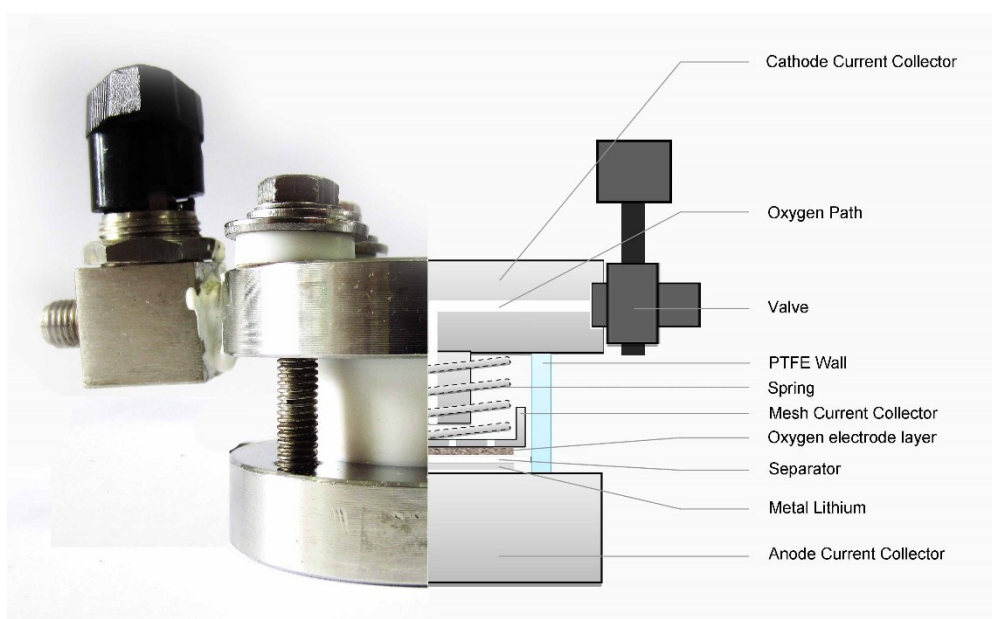

Fig. S1 The construction view of the homemade Lithium air battery device

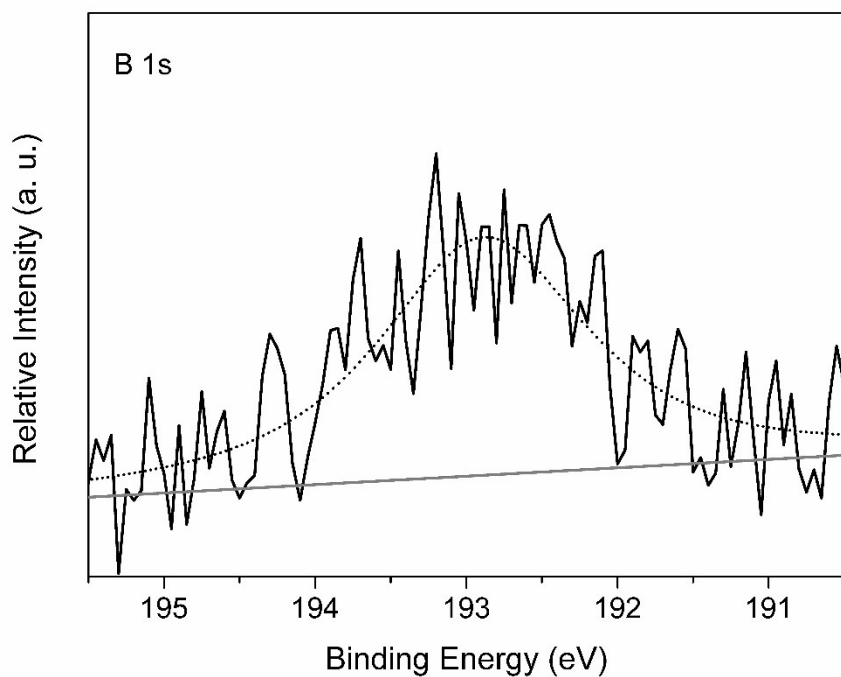

Fig. S2 The X-ray photoelectron spectrum for B of the  $\text{Co}_3\text{O}_4/\text{C}$  sample

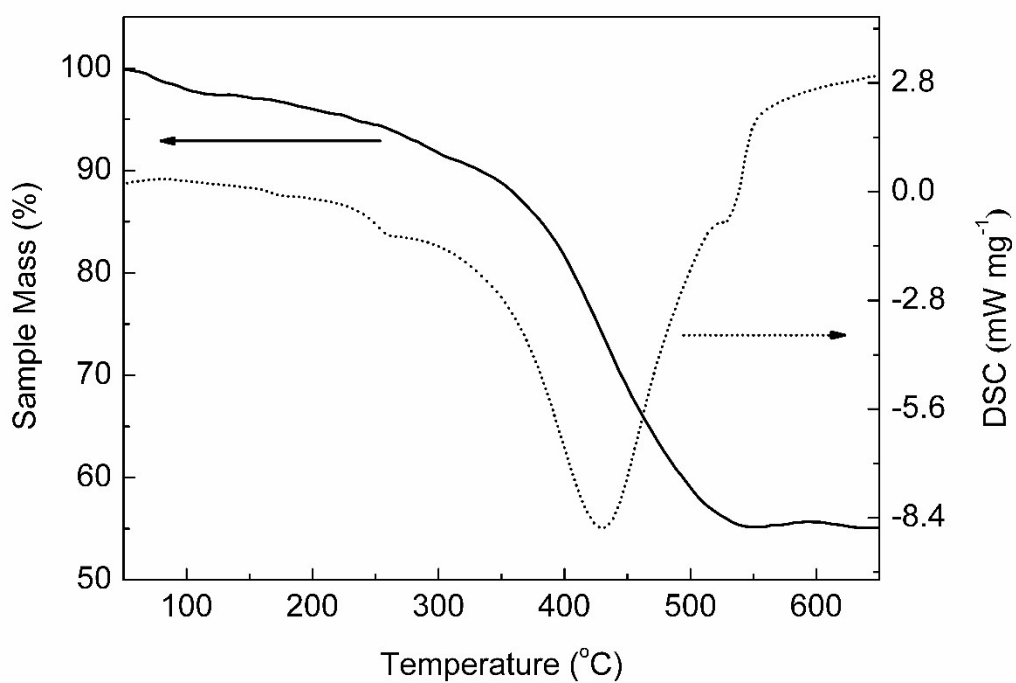

Fig. S3 The TG-DSC curves of the as-prepared  $\text{Co}_3\text{O}_4/\text{C}$  sample in air, conducted at a heating rate of  $10\text{ }^\circ\text{C min}^{-1}$ .

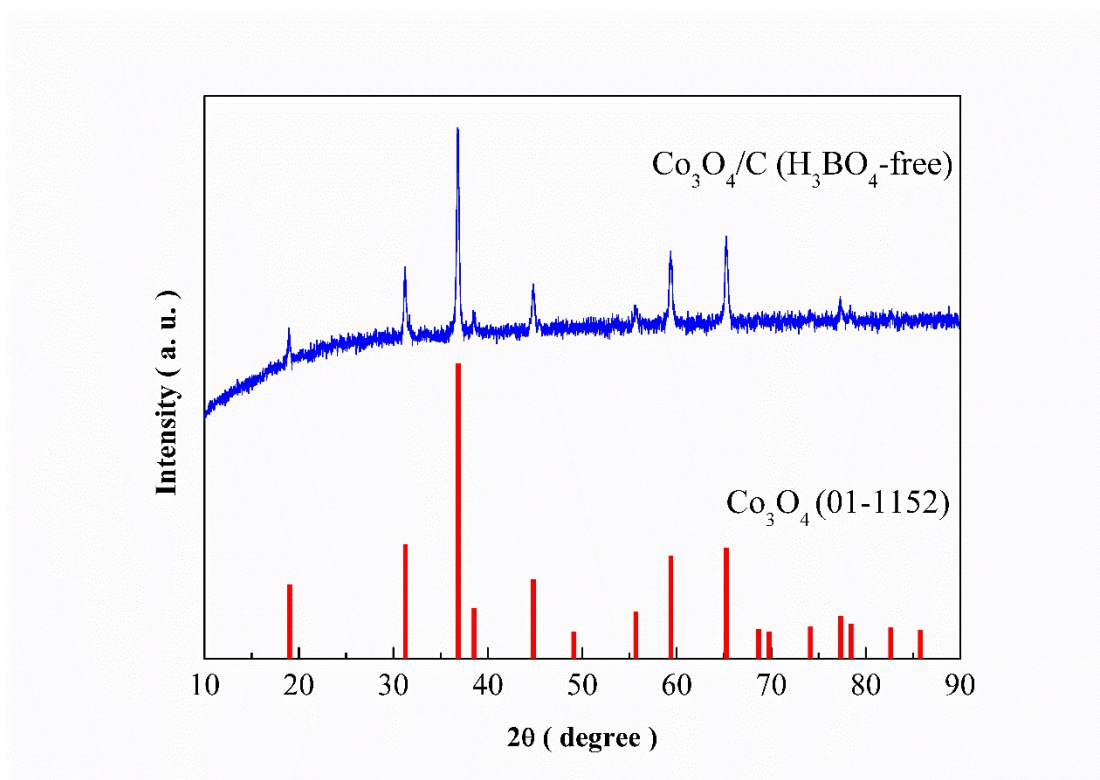

Fig. S4 The XRD patterns of the as-prepared  $\text{Co}_3\text{O}_4/\text{C}$  sample ( $\text{H}_3\text{BO}_4$ -free) without additional addition of  $\text{H}_3\text{BO}_4$  during synthesis.

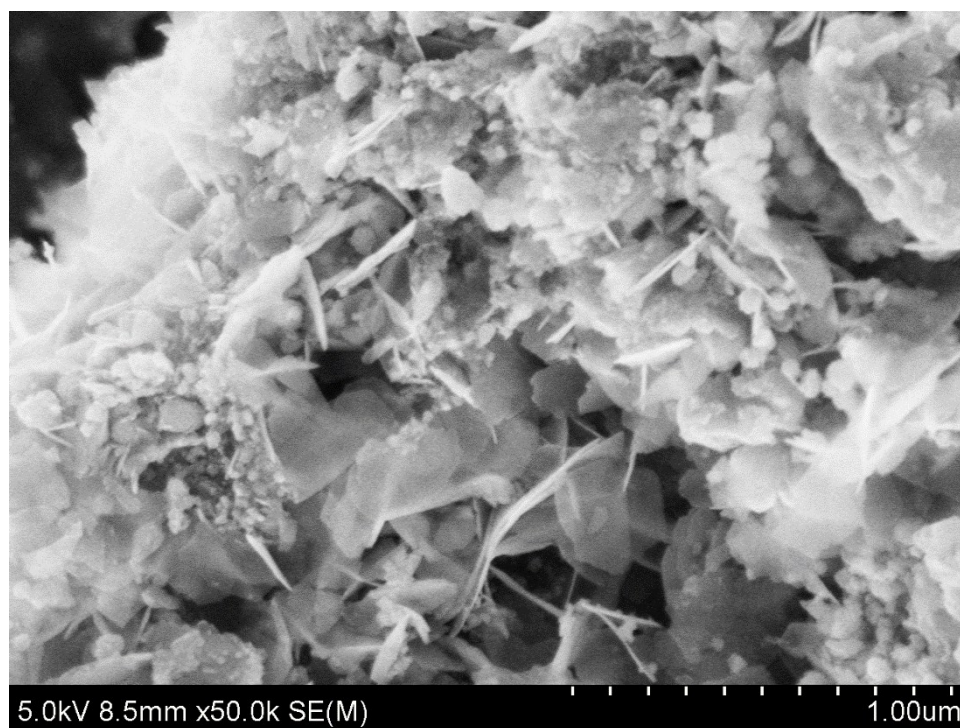

Fig. S5 The FE-SEM image of the as-prepared  $\text{Co}_3\text{O}_4/\text{C}$  ( $\text{H}_3\text{BO}_4$ -free) sample.



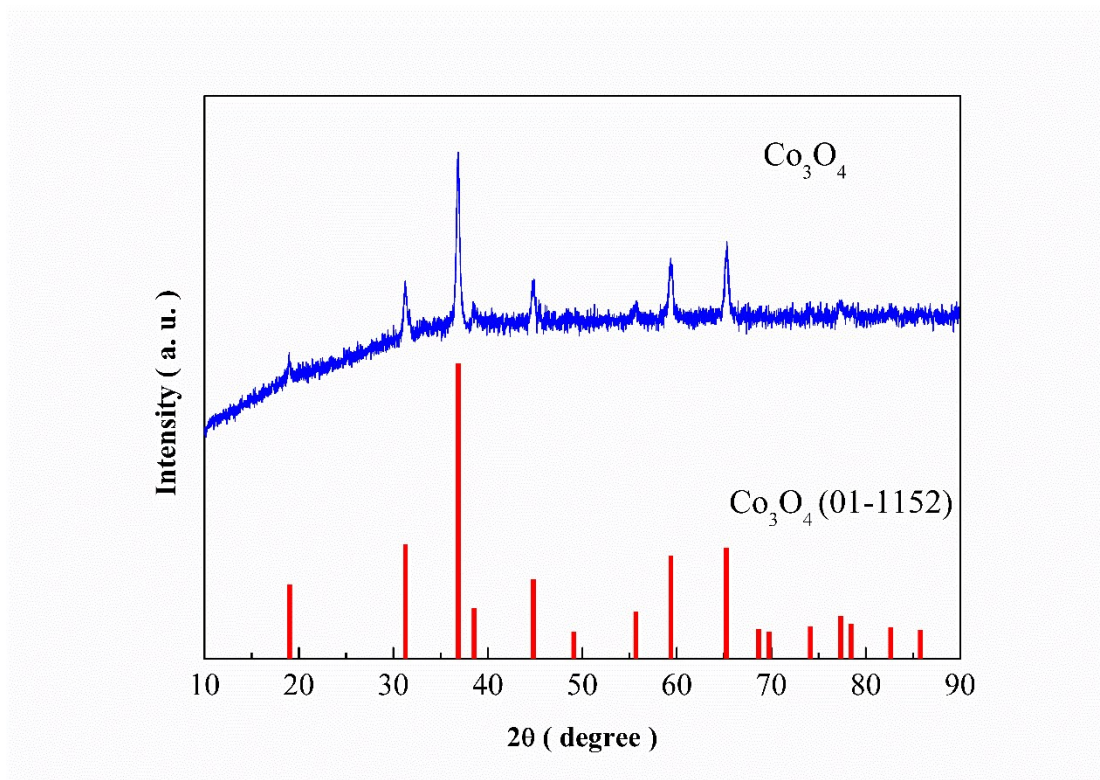

Fig. S6 The XRD patterns of the as-prepared nano  $\text{Co}_3\text{O}_4$  sample.

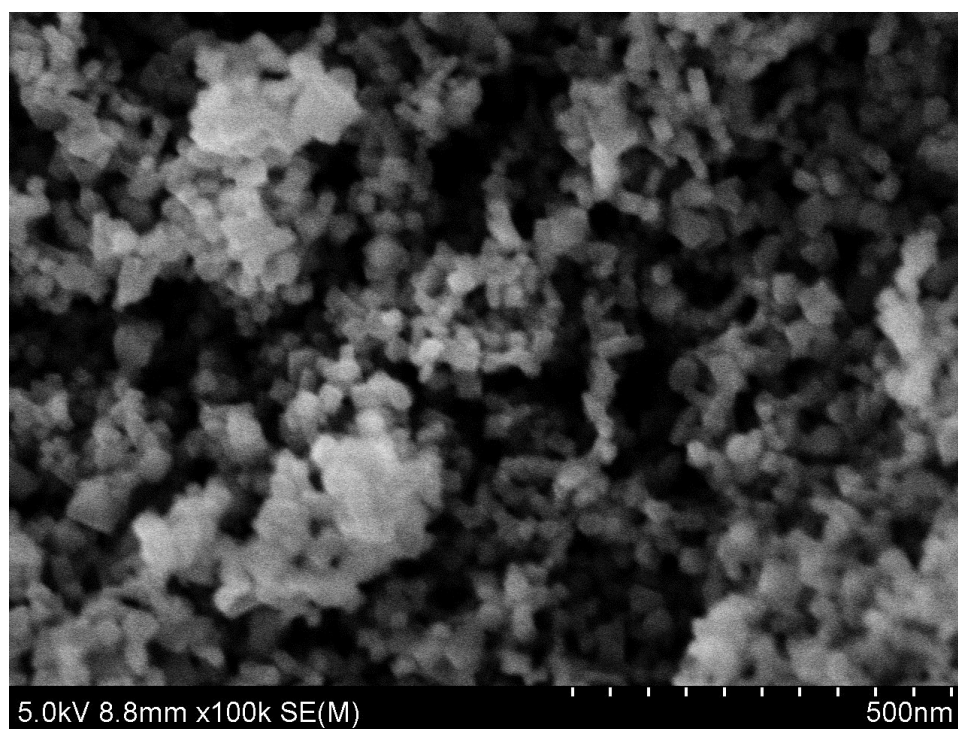

Fig. S7 The FE-SEM image of the as-prepared nano  $\text{Co}_3\text{O}_4$  sample.
